# Supplementary material
Source: PubMed Central journal article supplement (PMC4859767)

## SUPPLEMENTARY FIGURE LEGENDS

Supplementary FigureS1. Characterization of mouse *Sod2*<sup>+/-</sup> and *Sod2*<sup>+/+</sup> embryonic fibroblast primary cell cultures. (a) The levels of MnSOD, UCP1 and UCP2 proteins in the primary cells obtained from the *Sod2*<sup>+/-</sup> and *Sod2*<sup>+/+</sup> mice were confirmed and are shown in comparison to corresponding mouse skin tissues (Figure 1). (b,c) ATP and lactate productions in the cells were measured.

Supplementary Table S2. MnSOD deficiency leads to lipid utilization.

Supplementary Figure S3. Alterations in glycolytic metabolism in lipid-depleted cells. The *Sod2*<sup>+/-</sup> and *Sod2*<sup>+/+</sup> primary cells were cultured in DMEM and lipid-reduced DMEM media. (a) The mRNA level of GAPDH was quantified by qRT-PCR normalized with average images of CuZnSOD and  $\beta$ -actin. (b) The mRNA level of lactate dehydrogenase A (LDH-A) was quantified by qRT-PCR. (c) The protein levels in the cells were measured.

## Supplementary data from the experimental procedures

qRT-PCR, Western blots and ATP production

*Sod2*<sup>+/-</sup> and *Sod2*<sup>+/+</sup> embryonic fibroblast primary cells were cultured in DMEM and lipid-reduced DMEM media. Total cellular mRNA and proteins were extracted and subjected to qRT-PCR and Western blots to quantify the levels of mRNA and proteins using gene-specific primer sets and antibodies. CuZnSOD and  $\beta$ -actin were used as internal controls. 100  $\mu$ g cell extracts were used to measure ATP production as described in the paper.

## Metabolism analysis using mouse skin tissues

The skin tissues from 6 mice for each genotype ( $Sod2^{+/+}$  and  $Sod2^{+/-}$ ) were prepared as described previously.<sup>10</sup> The tissues were provided to Metabolomics Fiehn Laboratory for analysis of metabolism using a developed metabolic array.

# Supplementary data

S1

**a**

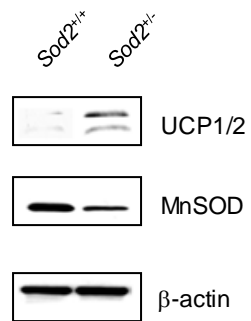

**b**

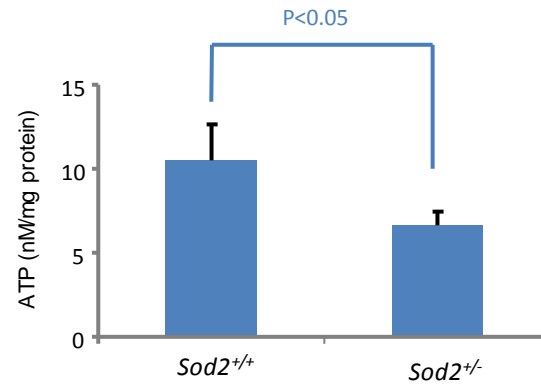

**c**

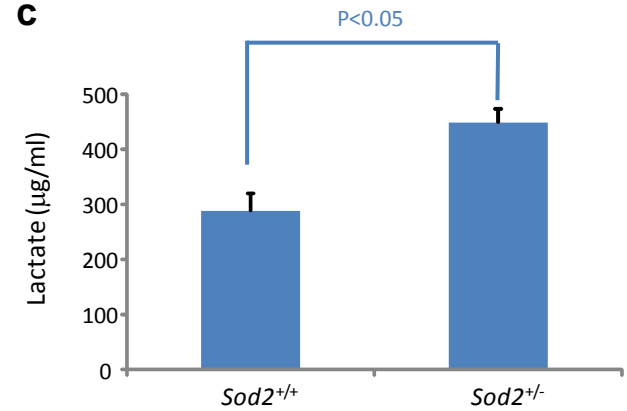

## S2

### Metabolism comparison in skin tissues ( *Sod2*<sup>+/-</sup> vs. *Sod2*<sup>+/+</sup> )

| Group       | Pathway                                    | Biochemical name                                                                                                                          | <i>SOD2</i> <sup>+/-</sup> vs. <i>SOD2</i> <sup>+/+</sup> | P-value |
|-------------|--------------------------------------------|-------------------------------------------------------------------------------------------------------------------------------------------|-----------------------------------------------------------|---------|
| Amino acid  | Valine, Leucine and isoleucine metabolism  | 4-methyl -2-oxopentanoate                                                                                                                 | 0.9                                                       | 0.0387  |
|             | Urea cycle; arginine proline, metabolism   | urea                                                                                                                                      | 0.79                                                      | 0.0262  |
|             | Glutathione metabolism                     | ophthalmate                                                                                                                               | 0.86                                                      | 0.0512  |
| Energy      | Oxidative Phosphorylation                  | methylphosphate                                                                                                                           | 0.41                                                      | 0.0043  |
| Lipid       | Essential fatty acid                       | dihomo-linolenate (20:3n3 or n6)<br>docosahexaenoate (DHA; 22:6n3)                                                                        | 0.65                                                      | 0.0494  |
|             | Long chain fatty acid                      | palmitate (16:0)<br>margarate (17:0)<br>10-heptadecenoate (17:1n7)<br>oleate (18:1n9)<br>linoleate (18:2n6)<br>eicosenoate (20:1n9 or 11) | 0.71                                                      | 0.0482  |
| Nucleotide  | Pruine metabolism; (hypo)xanthine/ inosine | Inosine                                                                                                                                   | 0.4                                                       | 0.0138  |
| Xenobiotics | Chemical                                   | glycerol 2-phosphate                                                                                                                      | 0.45                                                      | 0.0035  |

**a**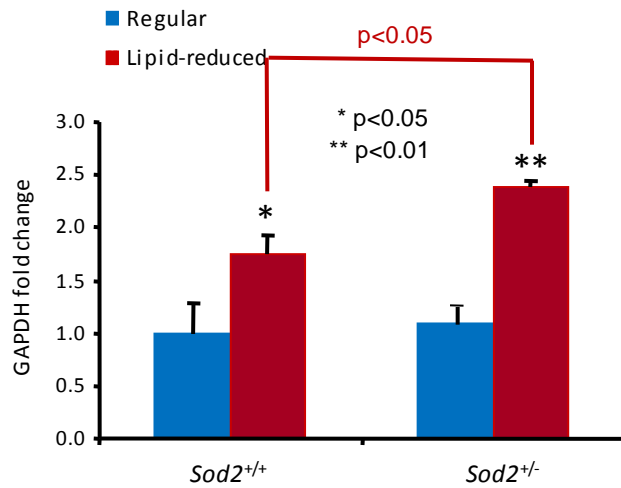**b**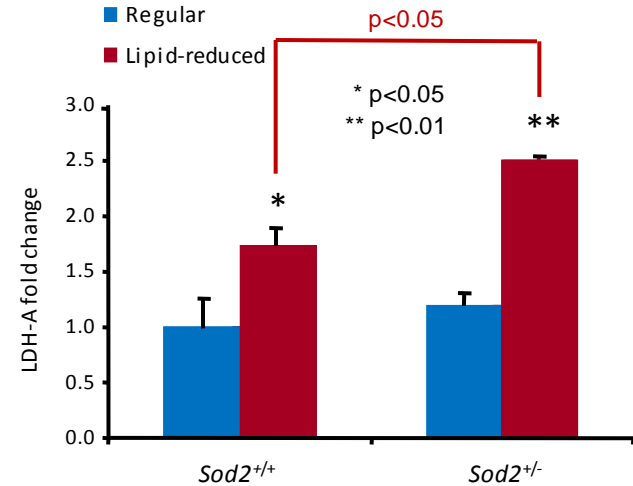**c**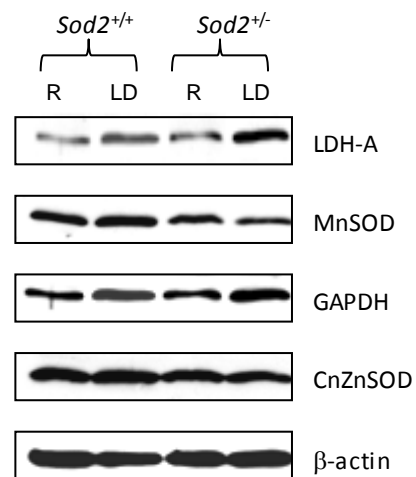

Supplement: NIHMS630112-supplement-01.pdf [file NIHMS630112-supplement-01.pdf]
